# Supplementary material
Source: publisher figshare collection journal article supplement (https://tandf.figshare.com/ndownloader/files/20285451)

**Appendix 1. Action Primes along with Turkish labels.**

1. Chopping vegetables, “doğra”


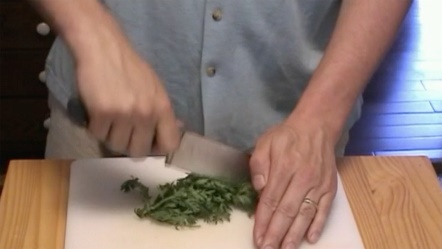


1. Cutting paper, “kes”


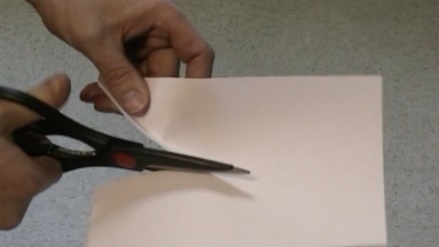


1. Dialing a phone, “tuşla”


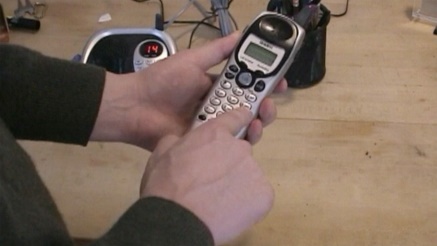


1. Hammering a nail, “çak”


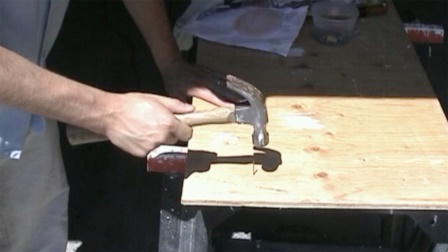


1. Scrubbing a dish, “yıka”


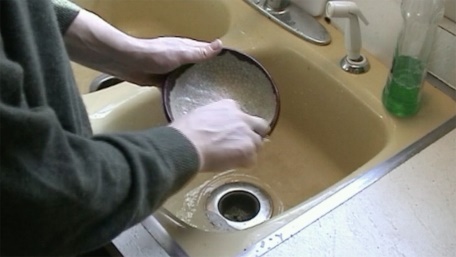


1. Stirring soup, “karıştır”


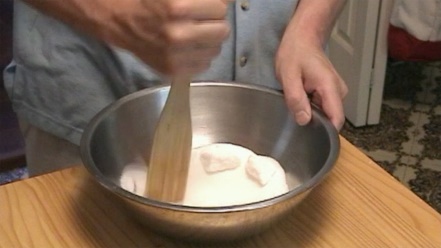


1. Turning a key, “döndür”


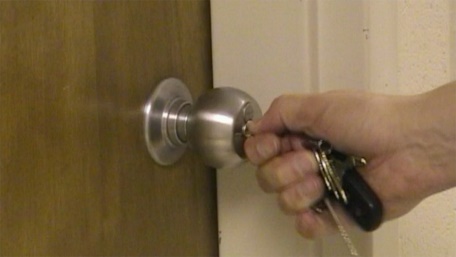


1. Twisting the lid of a jar, “çevir”


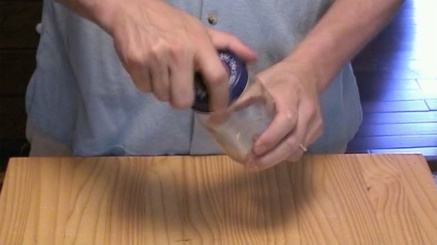


1. Typing, “yaz”


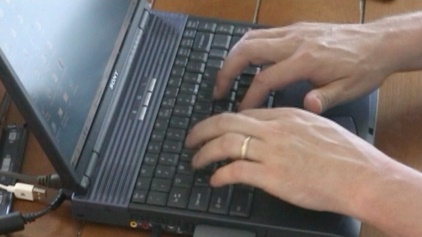


1. Wiping the desk, “sil”


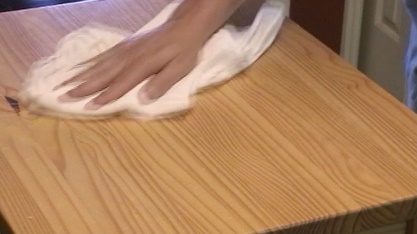

Supplement: Supplementary file 1 [file 20285451]
